# Supplementary material for: Monitoring Pertussis Infections Using Internet Search Queries
Source: PubMed Central journal article supplement (PMC5585203; doi:10.1038/s41598-017-11195-z), 2017-09-05
Supplement: 41598_2017_11195_MOESM1_ESM.pdf [file 41598_2017_11195_MOESM1_ESM.pdf]

# Supplementary Information

## Monitoring Pertussis Infections Using Internet Search Queries

Yuzhou Zhang<sup>1</sup>, Gabriel Milinovich<sup>1</sup>, Zhiwei Xu<sup>1</sup>, Hilary Bambrick<sup>1</sup>, Kerrie Mengersen<sup>2</sup>, Shilu Tong<sup>1,3,4</sup>, Wenbiao Hu<sup>1</sup>

1. School of Public Health and Social Work; Institute of Health and Biomedical Innovation, Queensland University of Technology, Brisbane, Queensland, Australia. Emails: Yuzhou Zhang: yuzhou.zhang@hdr.qut.edu.au; Gabriel Milinovich: g.milinovich@uq.edu.au; Zhiwei Xu: xzw1011@gmail.com; Hilary Bambrick: h.bambrick@qut.edu.au; Shilu Tong: s.tong@qut.edu.au; Wenbiao Hu: w2.hu@qut.edu.au

2. Science and Engineering Faculty, Mathematical and Statistical Science, Queensland University of Technology, Brisbane, Queensland, Australia. Kerrie Mengersen: k.mengersen@qut.edu.au

3. School of Public Health and Institute of Environment and Human Health, Anhui Medical University, Hefei, China. Shilu Tong: s.tong@qut.edu.au;

4. Shanghai Children's Medical Centre, Shanghai Jiao-Tong University, Shanghai, China. Shilu Tong: s.tong@qut.edu.au;

### Author contributions

W.H. developed the original idea for this research. Y.Z. collected, analysed, interpreted the data and drafted this manuscript. G.M., Z.X., K.M. contributed to revising the manuscript. H.B., S.T. reviewed the manuscript.

### Corresponding author

Wenbiao Hu, School of Public Health and Social Work; Institute of Health and Biomedical Innovation, Queensland University of Technology, Brisbane, Queensland, Australia. Phone: +61 31385724 Email: w2.hu@qut.edu.au;

29 **Appendix Content**

| Section                                                                                                                                                                                                                                                                                                                                                                                                                                             | Page |
|-----------------------------------------------------------------------------------------------------------------------------------------------------------------------------------------------------------------------------------------------------------------------------------------------------------------------------------------------------------------------------------------------------------------------------------------------------|------|
| Figure S1                                                                                                                                                                                                                                                                                                                                                                                                                                           | 24   |
| <p>Systematic seasonal variations and trends for pertussis incidence rates and GT at state and territory level from 2004 to 2015; In Systematic seasonal variations graph: Y axis is Seasonal factors; In Trends graph: Y axis are GT metrics (left Y axis) and Pertussis incidence (right Y axis).</p>                                                                                                                                             |      |
| Figure S2                                                                                                                                                                                                                                                                                                                                                                                                                                           | 27   |
| <p>Figure S2. Coloured bars show time-series cross correlation results for pertussis incidence rates with GT metrics (2004–15) in Australian states and territories. Blue bars indicate the value of search term pertussis, the values of search queries whooping and whooping cough are indicated by green bars and grey bars separately. Confidence intervals (95%) are indicated by the dashed lines (X axis: lag value, Y axis: CCF value).</p> |      |
| Figure S3                                                                                                                                                                                                                                                                                                                                                                                                                                           | 29   |
| <p>Autocorrelation function (ACF) and partial autocorrelation function (PACF) of the residual series of the SARIMA model (2,0,2) (1,0,0).</p>                                                                                                                                                                                                                                                                                                       |      |
| Table S1                                                                                                                                                                                                                                                                                                                                                                                                                                            | 30   |
| <p>Spearman's rho values for the monthly GT metrics in Australia from 1 January, 2004 to 31 December, 2015.</p>                                                                                                                                                                                                                                                                                                                                     |      |
| Table S2                                                                                                                                                                                                                                                                                                                                                                                                                                            | 31   |
| <p>Time-series cross correlation analysis in 1-2 lag months between the NNDSS pertussis surveillance data and GT from 2004 to 2015.</p>                                                                                                                                                                                                                                                                                                             |      |
| Table S3                                                                                                                                                                                                                                                                                                                                                                                                                                            | 32   |
| <p>Sensitivity and specificity of the SARIMA model (2,0,2) (1,0,0) for pertussis.</p>                                                                                                                                                                                                                                                                                                                                                               |      |

31 **Figure S1:** Systematic seasonal variations and trends for pertussis incidence rates and GT at state and territory level from 2004 to 2015; In Systematic seasonal variations graph: Y axis is Seasonal factors; In  
 32 Trends graph: Y axis are GT metrics (left) and Pertussis incidence (right).

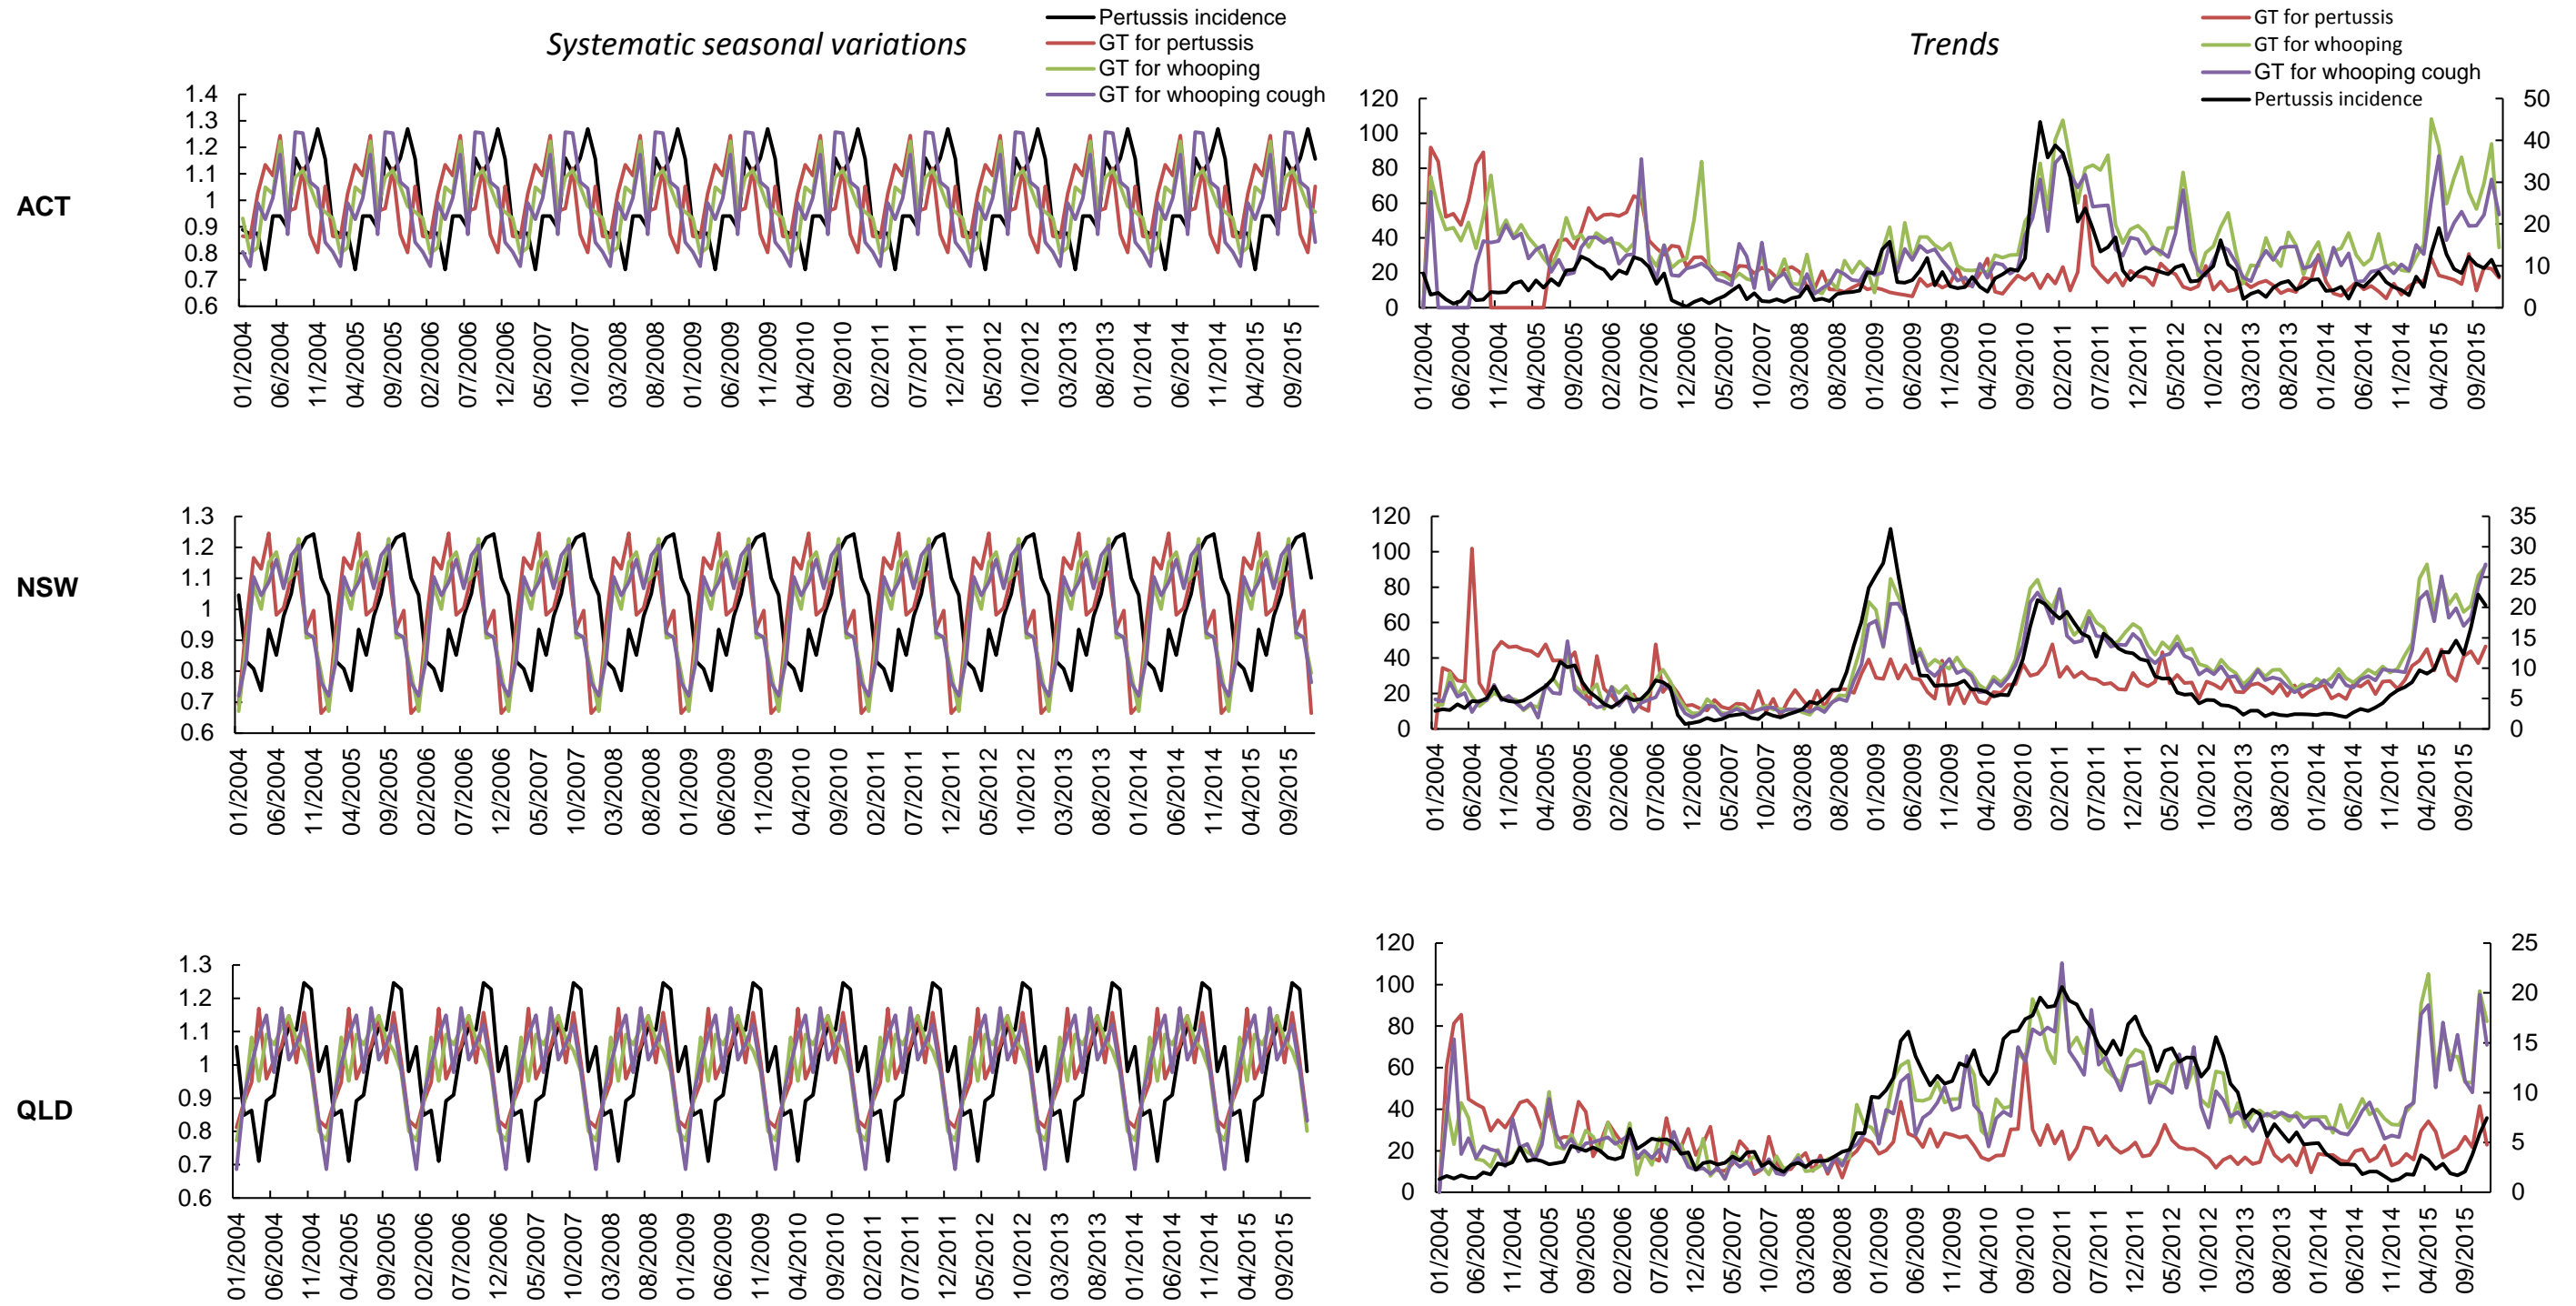

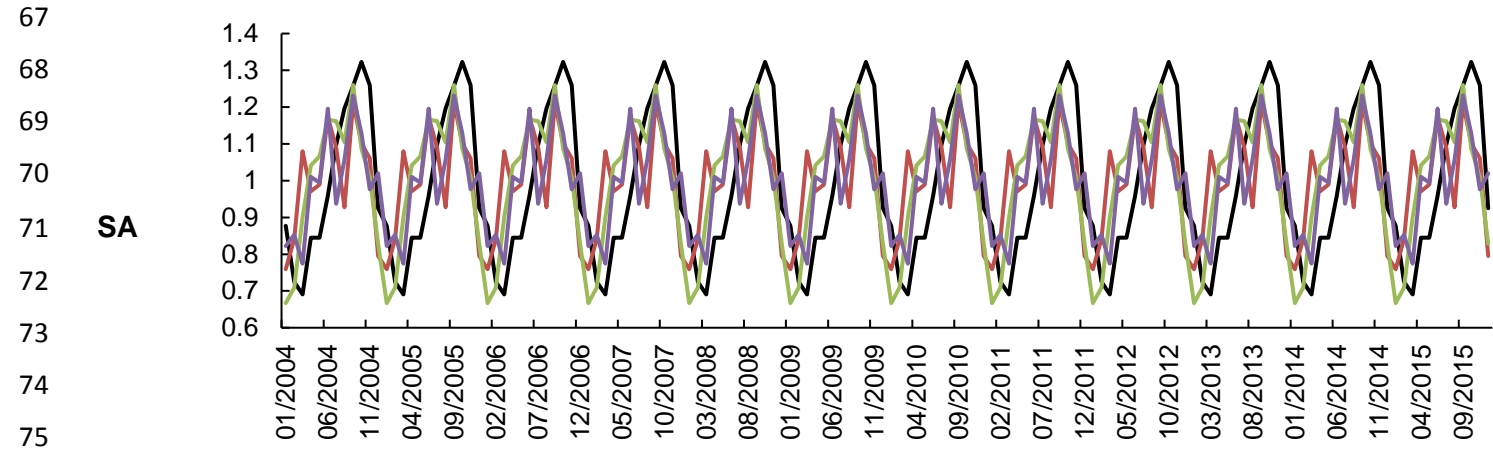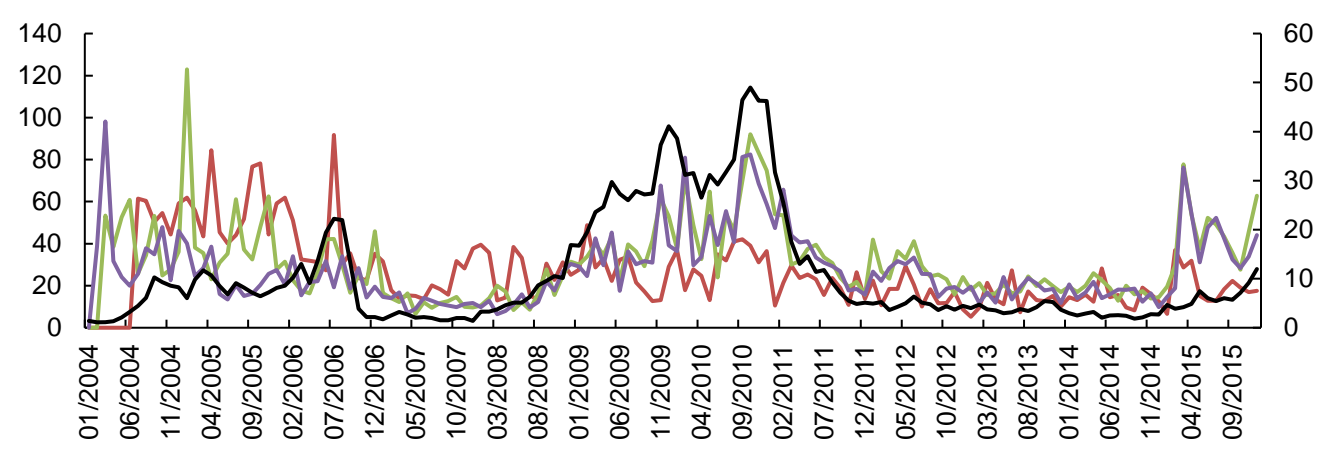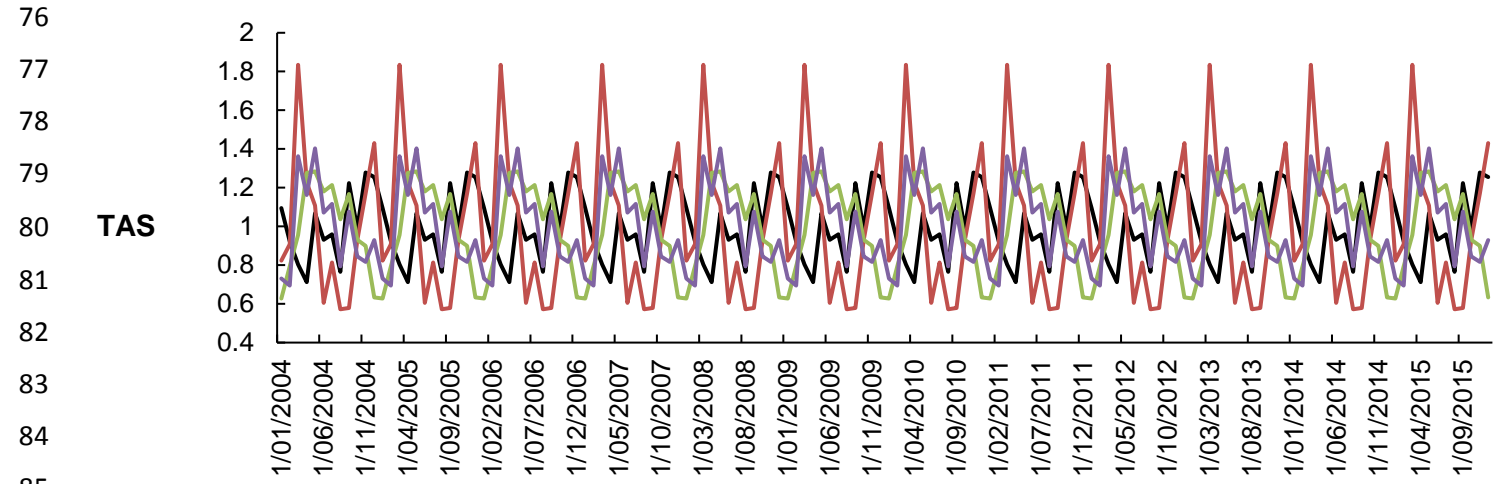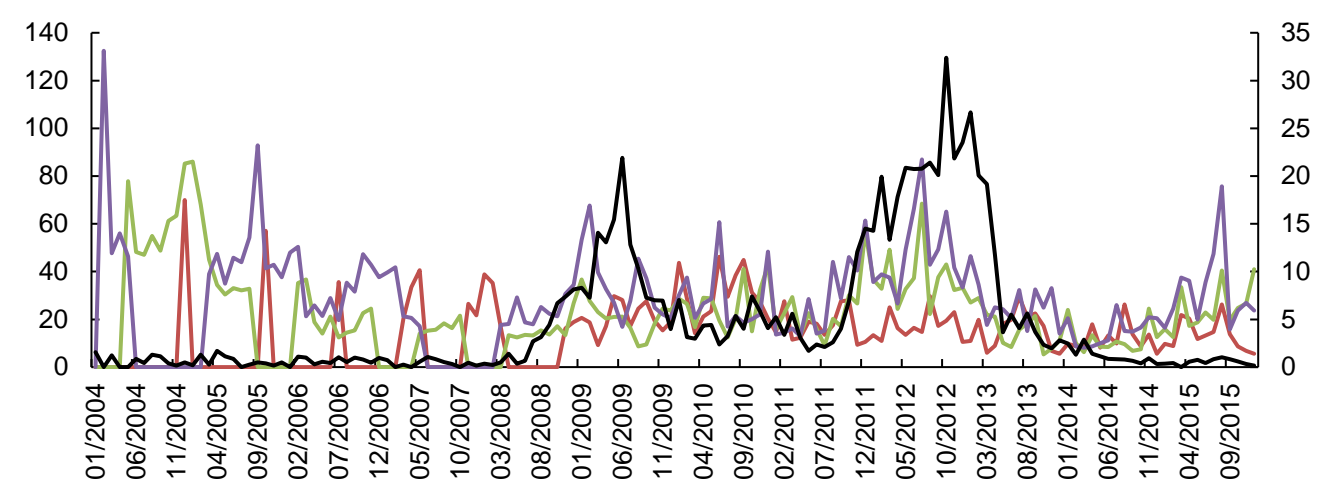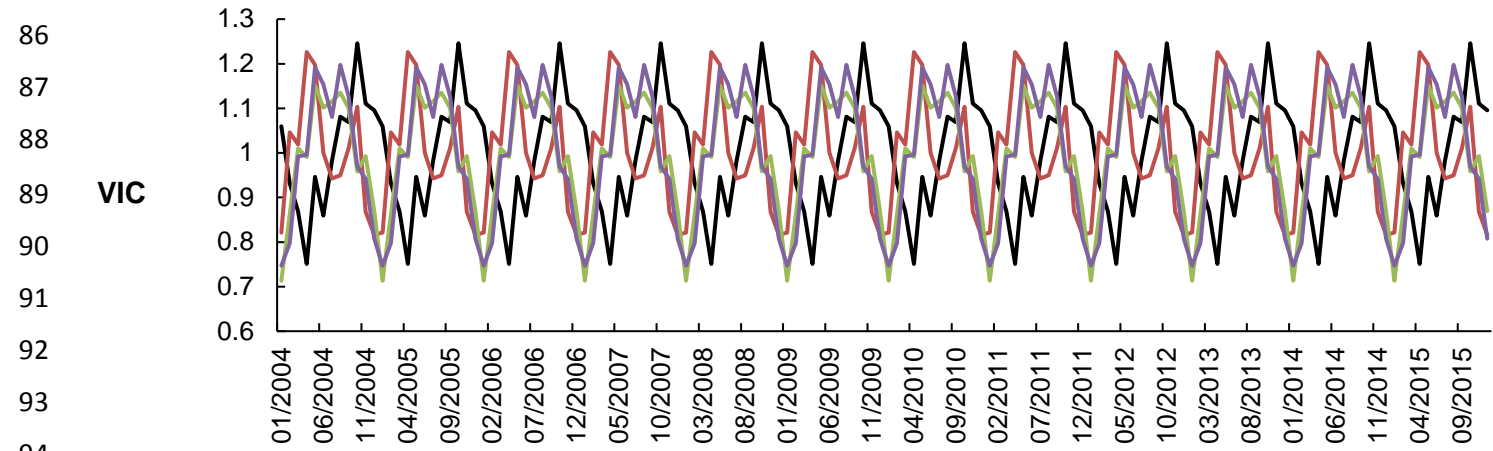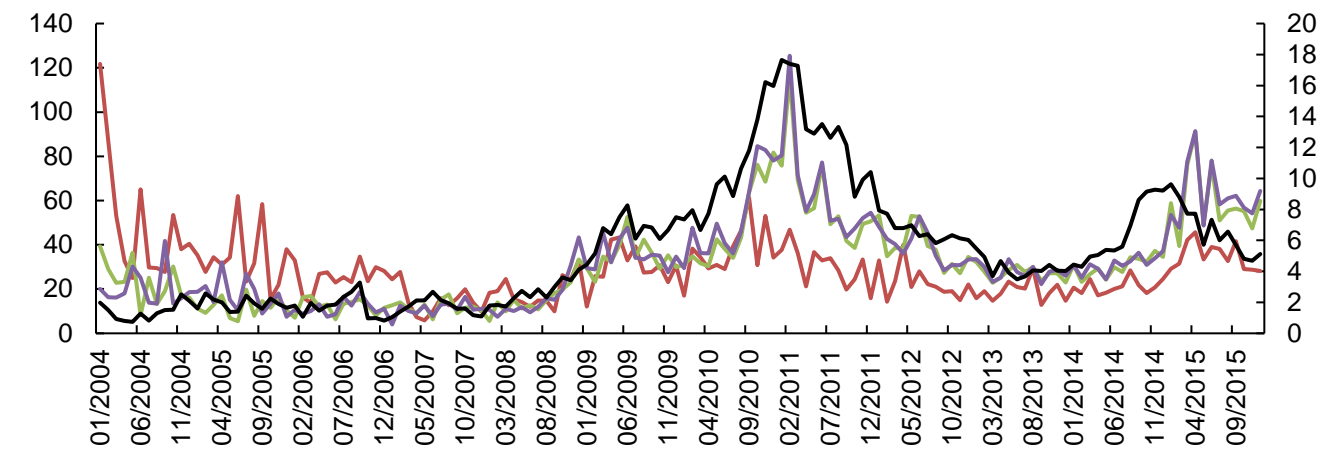

102  
103  
104  
105  
106  
107  
108  
109  
110  
111

**WA**

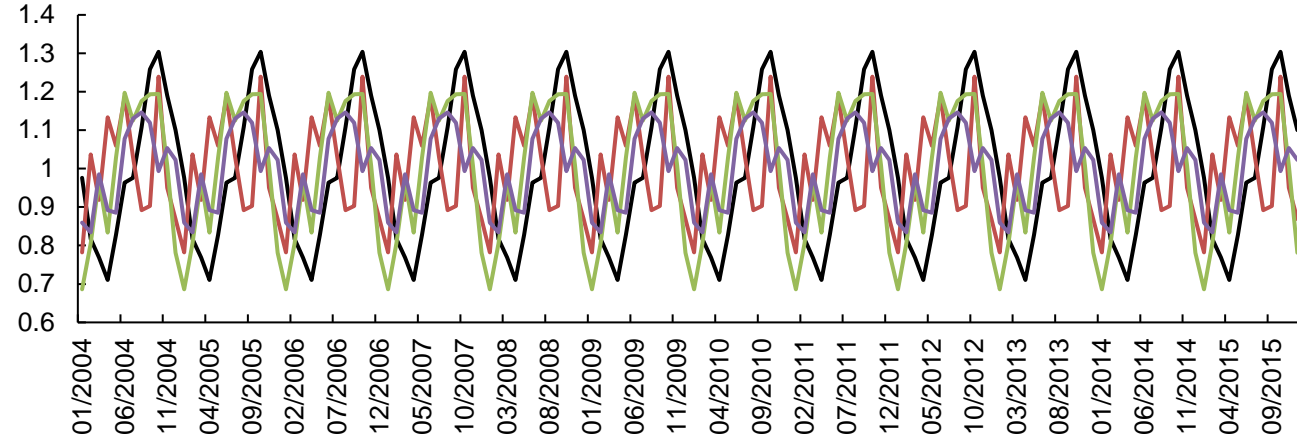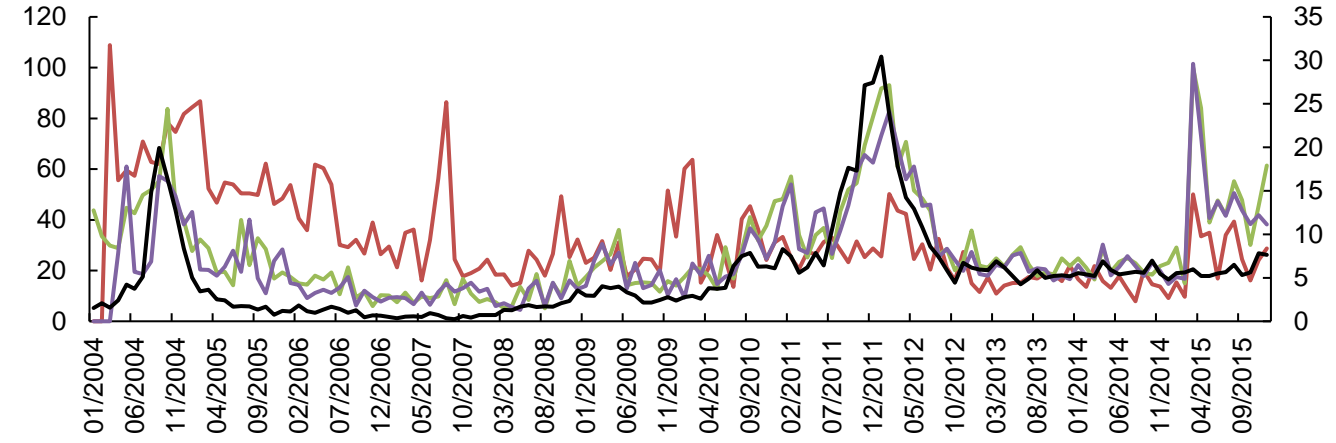

ACT : Australian Capital Territory; NSW: New South Wales; QLD: Queensland; SA: South Australia; TAS: Tasmania; VIC: Victoria; WA: Western Austral

112 **Figure S2.** Coloured bars show time-series cross correlation results for pertussis incidence rates with  
 113 GT metrics (2004–15) in Australian states and territories. Blue bars indicate the value of search term  
 114 pertussis, the values of search queries whooping and whooping cough are indicated by green bars  
 115 and grey bars separately. Confidence intervals (95%) are indicated by the dashed lines (X axis: lag  
 116 value, Y axis: CCF value).

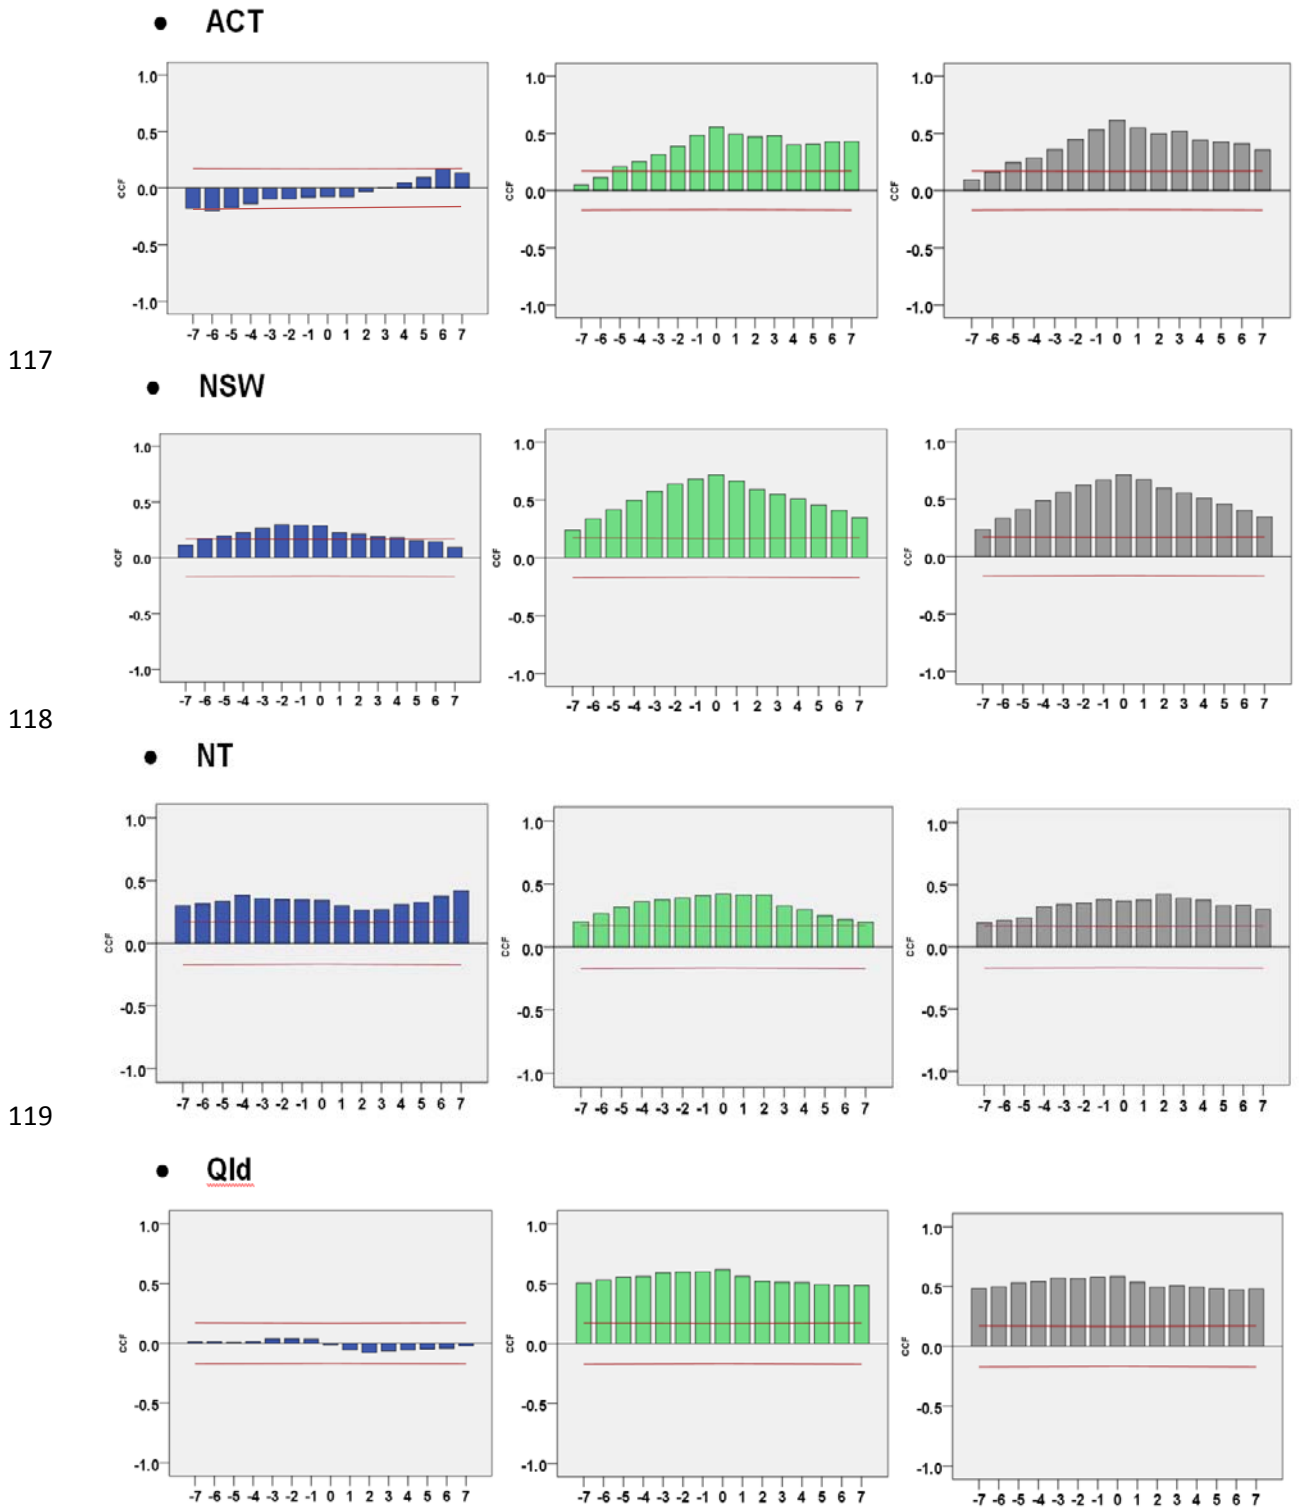

● SA

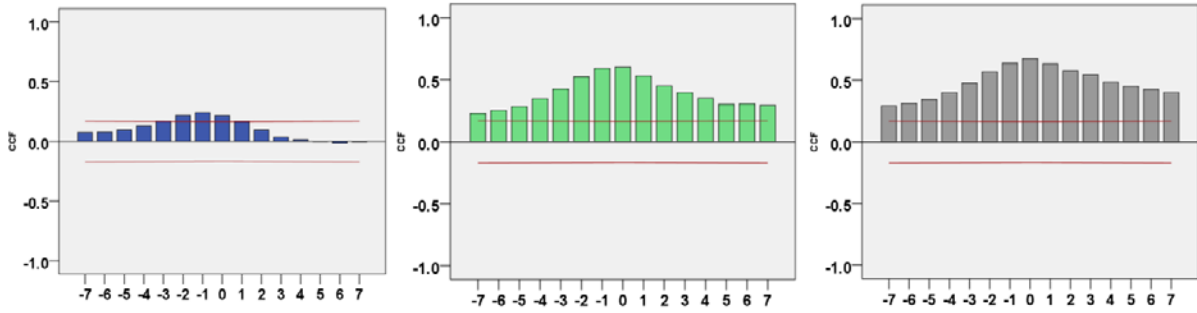

121

● Tas

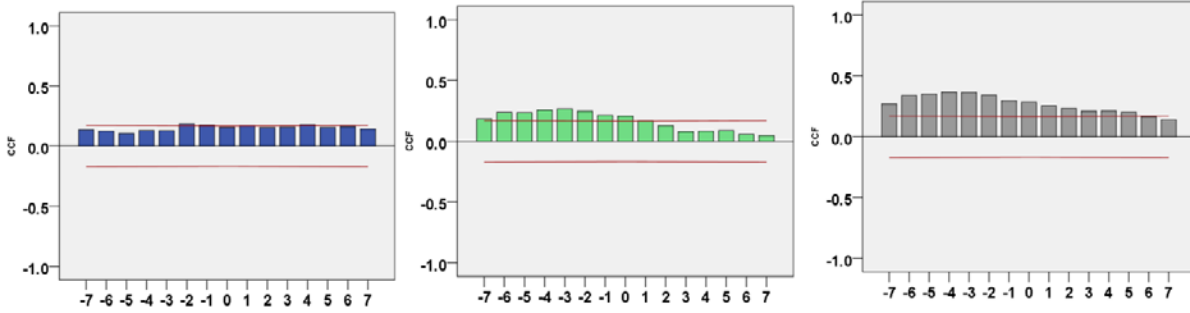

122

● Vic

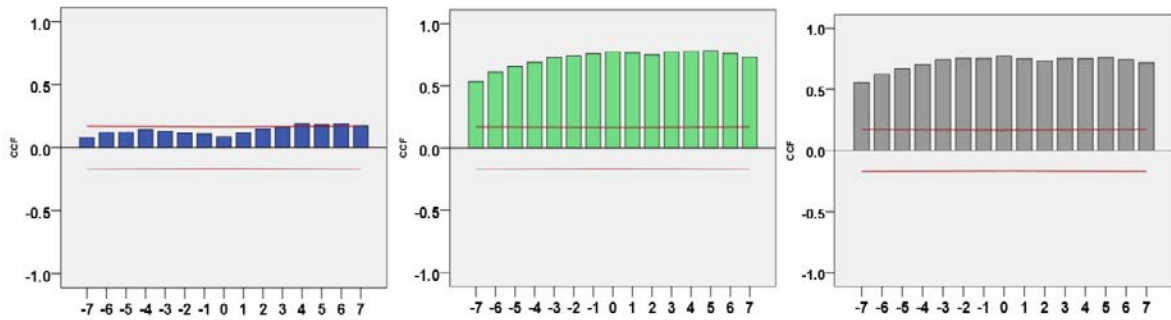

123

● WA

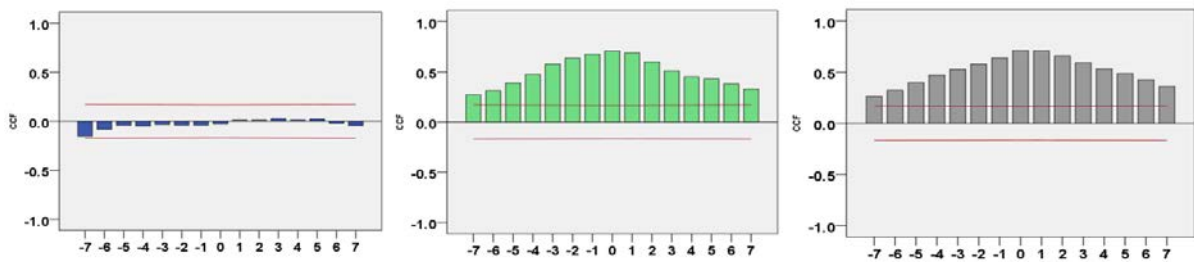

124

Figure S3. Autocorrelation function (ACF) and partial autocorrelation function (PACF) of the residual series of the SARIMA model (2,0,2) (1,0,0).

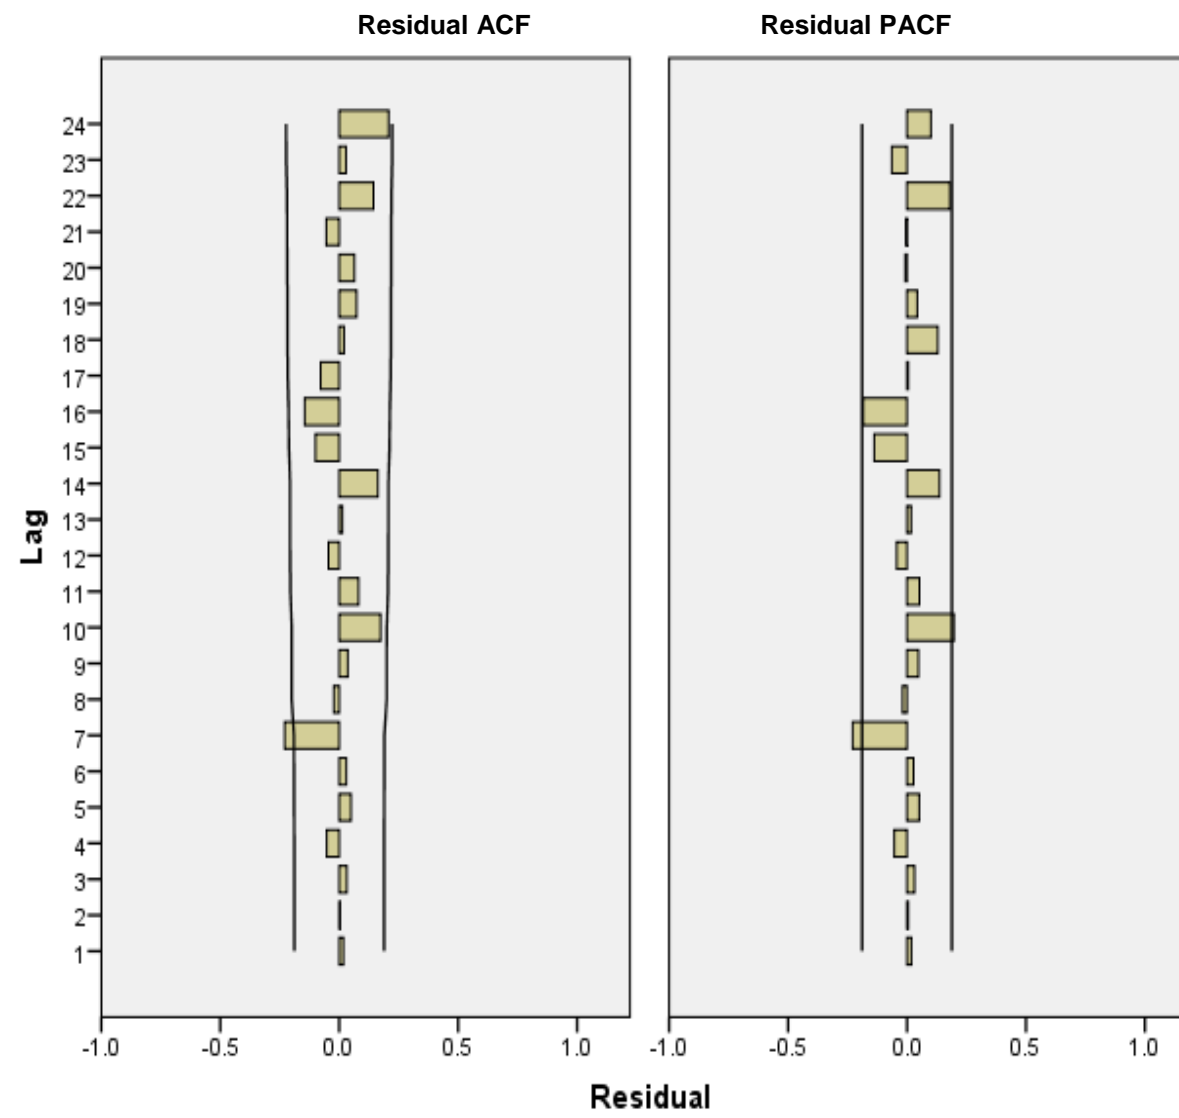



**Table S1.** Spearman's rho values for the monthly GT metrics in Australia from 1 January, 2004 to 31 December, 2015.

| Google Trends' data |        |        |        |        |        |        |        |        |        |
|---------------------|--------|--------|--------|--------|--------|--------|--------|--------|--------|
| Search term         | AUS    | ACT    | NSW    | NT     | QLD    | SA     | TAS    | VIC    | WA     |
| Pertussis           | 0.63** | -0.04  | 0.48** | 0.33** | 0.07   | 0.44** | 0.39** | 0.14   | -0.09  |
| Whooping            | 0.81** | 0.54** | 0.71** | 0.61** | 0.55** | 0.60** | 0.23** | 0.81** | 0.74** |
| Whooping cough      | 0.82** | 0.64** | 0.71** | 0.51** | 0.52** | 0.63** | 0.18*  | 0.81** | 0.77** |

\*:  $p < 0.05$ ; \*\*:  $p < 0.01$ .

AUS: Australia; ACT : Australian Capital Territory; NSW: New South Wales; NT: North Territory; QLD: Queensland; SA: South Australia; TAS: Tasmania; VIC: Victoria; WA: Western Australia.

151  
152  
153  
154  
155  
156  
157  
158  
159  
160  
161  
162  
163  
164  
165  
166  
167  
168  
169  
170  
171  
172  
173  
174  
175  
176  
177  
178  
179  
180  
181  
182  
183  
184  
185  
186  
187  
188  
189  
190

191  
192

**Table S2.** Time-series cross correlation analysis in 1-2 lag months between the NNDSS pertussis surveillance data and GT from 2004 to 2015.

| Pertussis surveillance data | GT for search term pertussis           |       |       |       |       |       |       |       |       |
|-----------------------------|----------------------------------------|-------|-------|-------|-------|-------|-------|-------|-------|
|                             | Aus                                    | ACT   | NSW   | NT    | Qld   | SA    | Tas   | Vic   | WA    |
| NNDSS, 2-month preceding    | 0.45*                                  | -0.01 | 0.21* | 0.25* | -0.07 | 0.11  | 0.16  | 0.15  | 0.07  |
| NNDSS, 1-month preceding    | 0.48*                                  | -0.06 | 0.22* | 0.28* | -0.04 | 0.18* | 0.17  | 0.12  | 0.07  |
| NNDSS, 0-month lagging      | 0.55*                                  | -0.06 | 0.29* | 0.32* | -0.00 | 0.23* | 0.16  | 0.10  | -0.03 |
| NNDSS, 1-month lagging      | 0.57*                                  | -0.06 | 0.29* | 0.33* | 0.05  | 0.25* | 0.17* | 0.12  | -0.04 |
| NNDSS, 2-month lagging      | 0.59*                                  | -0.08 | 0.30* | 0.33* | 0.05  | 0.23* | 0.18* | 0.12  | -0.04 |
|                             | GT data for search term whooping       |       |       |       |       |       |       |       |       |
| NNDSS, 2-month preceding    | 0.63*                                  | 0.46* | 0.58* | 0.42* | 0.51* | 0.45* | 0.13  | 0.74* | 0.60* |
| NNDSS, 1-month preceding    | 0.68*                                  | 0.48* | 0.65* | 0.41* | 0.55* | 0.53* | 0.17* | 0.75* | 0.69* |
| NNDSS, 0-month lagging      | 0.72*                                  | 0.54* | 0.70* | 0.42* | 0.60* | 0.60* | 0.21* | 0.76* | 0.72* |
| NNDSS, 1-month lagging      | 0.70*                                  | 0.47* | 0.66* | 0.41* | 0.59* | 0.59* | 0.21* | 0.75* | 0.68* |
| NNDSS, 2-month lagging      | 0.68*                                  | 0.38* | 0.62* | 0.39* | 0.58* | 0.52* | 0.25* | 0.73* | 0.64* |
|                             | GT data for search term whooping cough |       |       |       |       |       |       |       |       |
| NNDSS, 2-month preceding    | 0.63*                                  | 0.49* | 0.58* | 0.43* | 0.48* | 0.57* | 0.23* | 0.72* | 0.65* |
| NNDSS, 1-month preceding    | 0.67*                                  | 0.54* | 0.65* | 0.38* | 0.52* | 0.63* | 0.25* | 0.74* | 0.71* |
| NNDSS, 0-month lagging      | 0.72*                                  | 0.61* | 0.69* | 0.36* | 0.57* | 0.67* | 0.28* | 0.76* | 0.71* |
| NNDSS, 1-month lagging      | 0.70*                                  | 0.52* | 0.65* | 0.37* | 0.56* | 0.64* | 0.30* | 0.75* | 0.63* |
| NNDSS, 2-month lagging      | 0.68*                                  | 0.44* | 0.61* | 0.35* | 0.55* | 0.57* | 0.34* | 0.75* | 0.56* |

\*: P<0.05

193  
194

195

**Table S3.** Sensitivity and specificity of the SARIMA model (2,0,2) (1,0,0) for pertussis.

| Actual         | Predicted  |                | Total |
|----------------|------------|----------------|-------|
|                | Occurrence | Non occurrence |       |
| Occurrence     | 10         | 3              | 13    |
| Non occurrence | 4          | 19             | 23    |
| Total          | 14         | 22             | 36    |

196

Sensitivity,  $10/13 = 77\%$ ; Specificity,  $19/23 = 83\%$ ; and crude agreement,  $(10+19)/36 = 81\%$

197
